# Supplementary material for: Child drownings in Bangladesh: need for action
Source: PubMed Central journal article supplement (PMC9171250; doi:10.1136/bmjpo-2022-001464), 2022-06-03
Supplement: bmjpo-2022-001464.draft_revisions.pdf [file bmjpo-2022-001464.draft_revisions.pdf]

# BMJ Paediatrics Open

BMJ Paediatrics Open is committed to open peer review. As part of this commitment we make the peer review history of every article we publish publicly available.

When an article is published we post the peer reviewers' comments and the authors' responses online. We also post the versions of the paper that were used during peer review. These are the versions that the peer review comments apply to.

The versions of the paper that follow are the versions that were submitted during the peer review process. They are not the versions of record or the final published versions. They should not be cited or distributed as the published version of this manuscript.

BMJ Paediatrics Open is an open access journal and the full, final, typeset and author-corrected version of record of the manuscript is available on our site with no access controls, subscription charges or pay-per-view fees (<http://bmjpaedsopen.bmj.com>).

If you have any questions on BMJ Paediatrics Open's open peer review process please email [info.bmjpo@bmj.com](mailto:info.bmjpo@bmj.com)

# BMJ Paediatrics Open

## Non-fatal child drowning death and its associated risk factors in Bangladesh: Urgent call for actionable measures

|                               |                                                                                                                                                                                                                                                                                                                                                                         |
|-------------------------------|-------------------------------------------------------------------------------------------------------------------------------------------------------------------------------------------------------------------------------------------------------------------------------------------------------------------------------------------------------------------------|
| Journal:                      | <i>BMJ Paediatrics Open</i>                                                                                                                                                                                                                                                                                                                                             |
| Manuscript ID                 | bmjpo-2022-001464                                                                                                                                                                                                                                                                                                                                                       |
| Article Type:                 | Original research letter                                                                                                                                                                                                                                                                                                                                                |
| Date Submitted by the Author: | 01-Mar-2022                                                                                                                                                                                                                                                                                                                                                             |
| Complete List of Authors:     | Hossain, Md. Jamal; State University of Bangladesh, Al-Mamun, Md. ; Bangabandhu Sheikh Mujibur Rahman Science and Technology University<br>Alam, Morshed; Jagannath University, Institution of Education and Research<br>Khatun, Mst. Rukaia ; Varendra University<br>Sarker , Md. Mokleshur ; State University of Bangladesh<br>Islam, Md.; University of Asia Pacific |
| Keywords:                     | Child Abuse, Child Psychiatry, Epidemiology                                                                                                                                                                                                                                                                                                                             |
|                               |                                                                                                                                                                                                                                                                                                                                                                         |

SCHOLARONE™  
Manuscripts

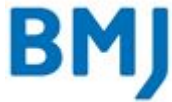

I, the Submitting Author has the right to grant and does grant on behalf of all authors of the Work (as defined in the below author licence), an exclusive licence and/or a non-exclusive licence for contributions from authors who are: i) UK Crown employees; ii) where BMJ has agreed a CC-BY licence shall apply, and/or iii) in accordance with the terms applicable for US Federal Government officers or employees acting as part of their official duties; on a worldwide, perpetual, irrevocable, royalty-free basis to BMJ Publishing Group Ltd ("BMJ") its licensees and where the relevant Journal is co-owned by BMJ to the co-owners of the Journal, to publish the Work in this journal and any other BMJ products and to exploit all rights, as set out in our [licence](#).

The Submitting Author accepts and understands that any supply made under these terms is made by BMJ to the Submitting Author unless you are acting as an employee on behalf of your employer or a postgraduate student of an affiliated institution which is paying any applicable article publishing charge ("APC") for Open Access articles. Where the Submitting Author wishes to make the Work available on an Open Access basis (and intends to pay the relevant APC), the terms of reuse of such Open Access shall be governed by a Creative Commons licence – details of these licences and which [Creative Commons](#) licence will apply to this Work are set out in our licence referred to above.

Other than as permitted in any relevant BMJ Author's Self Archiving Policies, I confirm this Work has not been accepted for publication elsewhere, is not being considered for publication elsewhere and does not duplicate material already published. I confirm all authors consent to publication of this Work and authorise the granting of this licence.

1  
2  
3 1 *Article type: Original Research Letter*  
4

5  
6 2 **Non-fatal child drowning death and its associated risk factors in Bangladesh:**  
7  
8 3 **Urgent call for actionable measures**

9  
10 4 **Md. Jamal Hossain<sup>1</sup>, Md. Al-Mamun<sup>2</sup>, Morshed Alam<sup>3</sup>, Mst. Rukaia Khatun<sup>4,5</sup>, Md.**  
11  
12 5 **Moklesur Rahman Sarker<sup>1</sup>, Md. Rabiul Islam<sup>6</sup>**

13  
14 6 <sup>1</sup> Department of Pharmacy, State University of Bangladesh, 77 Satmasjid Raod, Dhanmondi, Dhaka 1205,  
15 Bangladesh

16  
17 8 <sup>2</sup> Department of Sociology, Bangabandhu Sheikh Mujibur Rahman Science and Technology University,  
18 Gopalganj-8100, Bangladesh

19  
20 10 <sup>3</sup> Institute of Education and Research, Jagannath University, Dhaka-1100, Bangladesh

21  
22 11 <sup>4</sup> Department of Public Health, Varendra University, Rajshahi 6204, Bangladesh

23  
24 12 <sup>5</sup> Seba Nursing Institute, Chapainawabganj 6300, Bangladesh

25  
26 13 <sup>6</sup> Department of Pharmacy, University of Asia Pacific, 74/A Green Road, Farmgate, Dhaka 1215,  
27 Bangladesh

28  
29  
30  
31 16 **\* Correspondence**

32 17 **Md. Jamal Hossain**

33  
34 18 Department of Pharmacy, State University of Bangladesh, 77 Satmasjid Road, Dhanmondi, Dhaka-1205,  
35 Bangladesh

36  
37 20 **Email:** jamal.du.p48@gmail.com

38  
39 21 jamalhossain@sub.edu.bd

40  
41  
42  
43 23 **Keywords:** *Child drowning; Insufficient parental supervision; Seasonality; Natural calamities;*  
44  
45 24 *Bangladesh.*

46  
47 25 **Word Count:** 661 (excluding title page, abstract, references, figures and tables)

48  
49 26 **References count:** 6

50  
51 27 **Figure count:** 1

52  
53  
54 28

## 29 **Non-fatal child drowning death and its associated risk factors in Bangladesh:** 30 **Urgent call for actionable measures**

### 32 **Abstract**

33 Drowning is one of the major public health concerns, and children are the most vulnerable victims  
34 of non-fatal drowning death in Bangladesh, which has been a paramount threat to child survival.  
35 Based on available data and raising concerns, we intend to underline the prevalence and associated  
36 risk factors for child drowning deaths in Bangladesh. According to the Center for Injury Prevention  
37 and Research, Bangladesh (CIPRB), about 19,000 people of all ages drown per year across the  
38 country, where approximately 77% are children (<18 years), which means that over forty  
39 Bangladeshi children drown per day. As of data collected from January 2020 to June 2021, the  
40 death rate of child drowning has been found to be 83%. Insufficient parental supervision, mother's  
41 illiteracy, lack of swimming ability, male gender, children under five years, geographical and  
42 environmental conditions, seasonality, and natural calamities significantly contribute to child  
43 drowning deaths in Bangladesh. We urge the governments and local administrations to address the  
44 current crisis by coordinating and integrating several effective efforts to prevent child drowning  
45 deaths.

46 **Keywords:** *Child drowning; Insufficient parental supervision; Seasonality; Natural calamities;*  
47 *Bangladesh.*

### 49 **Main Text**

50 Drowning is a significant yet frequently overlooked public health hazard in both developing and  
51 developed countries. According to the World Health Organization (WHO) Global Report-2019,  
52 320,000 people worldwide die every year from drowning as the world's third-leading death cause.<sup>1</sup>  
53 Drowning is the eighth most significant cause of mortality and the twelfth leading source of illness  
54 burden in South-East Asia, including Bangladesh.<sup>2</sup> Over half of all drowning deaths occurs in the  
55 Western Pacific and Southeast Asian region. As of data published by Unicef and the National  
56 Institute of Population Research and Training (NIPRT), drowning-death accounted for over one-

1  
2  
3 57 fourth (26%) and two-fifths deaths (42%) of all deaths of children aged 1 to 4 years in Bangladesh  
4 58 in 2003 and 2011, respectively (Figure 1).<sup>2</sup> Notably, children aged 0 to 4 years are near three times  
5 59 more likely to drown than children aged 10-17 years.<sup>3</sup> Besides, the prevalence of death rate from  
6 60 the drowning of rural children is significantly higher than urban children in the country.<sup>2,3</sup>

7  
8  
9  
10  
11 61 A survey conducted by the Center for Injury Prevention and Research, Bangladesh (CIPRB) in  
12 62 collaboration with the Department of Health and Unicef reported that approximately 19,000 people  
13 63 of all ages drown per year in Bangladesh. Among them, 14,500 (77%) are children.<sup>4</sup> Another recent  
14 64 survey performed by SoMaSHTe (Society for Media and Suitable Human Communication  
15 65 Techniques) in support of Global Health Advocacy Incubator (GHAI) revealed that 83% of  
16 66 children died from drowning in the last one and half years (January 2020 to June 2021), where  
17 67 more than two-third (□ 69%) were below nice years (0 to 4 years = 36.66% and 5 to 9 years =  
18 68 31.96%; Figure 1).<sup>5</sup> The study also reported that the boys were significantly more victims from  
19 69 drowning compared to the girls (60.82% vs. 38.65%), and the Dhaka (23%) and Chittagong (19%)  
20 70 divisions showed the highest prevalence in terms of death rate in the country (Figure 1).<sup>5</sup>

21  
22  
23  
24  
25  
26  
27  
28  
29 71 Children in low- and middle-income countries, including Bangladesh are more likely to drown if  
30 72 they are not adequately supervised, male, there are no physical barriers between them and bodies  
31 73 of water, and they are not proficient swimmers.<sup>1,2,3</sup> In countries and regions where social,  
32 74 economic, and geographic shifts occur, the risks of drowning deaths vary widely. Besides, parents'  
33 75 illiteracy (no schooling) was associated with 3.7 times and 2.9 times higher risk of fatal and non-  
34 76 fatal drowning, respectively, than secondary or higher-level education in Bangladesh.<sup>2</sup> Around  
35 77 80% of the drowning deaths are happened due to the exposure of the natural water bodies like  
36 78 ponds, channels, buckets and ditches, and within 20 meters of victim's home.<sup>2,4</sup> Furthermore,  
37 79 three-fifths (60%) drowning cases occur between 9 am and 1 pm, and children of large households  
38 80 are riskier than children of small families.<sup>3</sup> Particularly, children in Bangladesh's lower regions  
39 81 (particularly in the southern part) are at greater risk than those in the country's higher areas because  
40 82 of their geographic location. Moreover, lack of parenteral supervision and oversight, natural  
41 83 calamities, lack of awareness of water safety, and unsafe behavior around water may be considered  
42 84 as dominant factors behind child mortality due to drowning.<sup>2,3</sup>

43  
44  
45  
46  
47  
48  
49  
50  
51  
52  
53  
54 85 The government of Bangladesh has already traced the issue of drowning as a prime concern of  
55 86 children's death and initiated some pilot basis actions for child protection. However, the regular

1  
2  
3 87 epidemiological surveillance and the rigorous drive to boost awareness countrywide are still  
4 88 focused off. The government and all the relevant social organizations should be committed to  
5 89 implementing a long-term national strategy based on proven interventions like establishing  
6 90 community-based childcare institutions with daycare to curb the high incidence of drowning. It is  
7 91 evident from pilot-based study that community-based supervision of young children and teaching  
8 92 of swimming to older children reduced by 82% and 90% chances of drowning, respectively.<sup>6</sup>  
9 93 Besides, parents and guardians need to make sure the kids understand the numerous places where  
10 94 they could drown. Furthermore, attention and raising community awareness of proper drowning  
11 95 rescue and resuscitation techniques should be a vital component of any program to reduce the  
12 96 death toll in Bangladesh.  
13  
14  
15  
16  
17  
18  
19  
20  
21  
22

## 23 98 **Statements**

### 24 99 **Patient and public involvement**

25  
26  
27  
28 100 Patients and/or the public were not involved in the design, or conduct, or reporting, or  
29 101 dissemination plans of this research.  
30  
31

### 32 102 **Funding**

33  
34 103 This research received no specific grant from any funding agency in the public, commercial or  
35 104 not-for-profit sectors.  
36  
37

### 38 105 **Competing Interests**

39  
40 106 None declared.  
41  
42

### 43 107 **Contributors**

44  
45 108 MAM conceived the idea and MJH designed the study. MJH, MAM, MA, and MRK collected  
46 109 data. MJH, MAM, MA, and MRK drafted the original version of the manuscript. MJH, MMRS,  
47 110 and MRI critically revised and improved the manuscript. All authors reviewed and approved the  
48 111 final version of the manuscript for publication.  
49  
50  
51

## 52 112 **References**

53  
54  
55  
56  
57  
58  
59  
60

- 1  
2  
3 113 1. Miller L, Alele FO, Emeto TI, Franklin RC. Epidemiology, risk factors and measures for  
4 114 preventing drowning in Africa: a systematic review. *Medicina*. 2019; 55(10): 637.  
5  
6 115 2. Rahman A, Alonge O, Bhuiyan AA, Agrawal P, Salam SS, Talab A, Rahman QS, Hyder AA.  
7 116 Epidemiology of Drowning in Bangladesh: An Update. *Int J Environ Res Public Health*. 2017;  
8 117 14(5): 488. doi: 10.3390/ijerph14050488.  
9  
10 118 3. Hossain M, Mani KK, Sidik SM, Hayati KS, Rahman AK. Socio-demographic, environmental  
11 119 and caring risk factors for childhood drowning deaths in Bangladesh. *BMC Pediatr*. 2015; 15:  
12 120 114. doi: 10.1186/s12887-015-0431-7.  
13  
14 121 4. Dhaka Tribune. Children under 10 account for 70% of drowning deaths in Bangladesh.  
15 122 Available from [https://www.dhakatribune.com/bangladesh/2021/07/25/children-under-10-](https://www.dhakatribune.com/bangladesh/2021/07/25/children-under-10-account-for-70-of-drowning-deaths-in-bangladesh)  
16 123 [account-for-70-of-drowning-deaths-in-bangladesh](https://www.dhakatribune.com/bangladesh/2021/07/25/children-under-10-account-for-70-of-drowning-deaths-in-bangladesh) [Accessed February 24, 2022].  
17  
18 124 5. Dhaka Tribune. Report: 83% drowning victims are children. Available from:  
19 125 [https://archive.dhakatribune.com/bangladesh/nation/2021/07/08/report-83-drowning-victims-](https://archive.dhakatribune.com/bangladesh/nation/2021/07/08/report-83-drowning-victims-are-children)  
20 126 [are-children](https://archive.dhakatribune.com/bangladesh/nation/2021/07/08/report-83-drowning-victims-are-children) [Accessed February 24, 2022].  
21  
22 127 6. CIPRB. Available from: [https://www.ciprb.org/centres/international-drowning-research-](https://www.ciprb.org/centres/international-drowning-research-centre-bangladesh-idrc-b/notable-activities/anchal/)  
23 128 [centre-bangladesh-idrc-b/notable-activities/anchal/](https://www.ciprb.org/centres/international-drowning-research-centre-bangladesh-idrc-b/notable-activities/anchal/) [Accessed February 26, 2022]  
24  
25  
26  
27  
28  
29  
30  
31  
32  
33  
34  
35  
36  
37  
38  
39  
40  
41  
42  
43  
44  
45  
46  
47  
48  
49  
50  
51  
52  
53  
54  
55  
56  
57  
58  
59  
60



1  
2  
3 144  
4  
5  
6 145  
7 146  
8  
9 147  
10  
11 148  
12  
13 149  
14 150  
15  
16  
17 151  
18  
19  
20  
21  
22  
23  
24  
25  
26  
27  
28  
29  
30  
31  
32  
33  
34  
35  
36  
37  
38  
39  
40  
41  
42  
43  
44  
45  
46  
47  
48  
49  
50  
51  
52  
53  
54  
55  
56  
57  
58  
59  
60

**Figure 1.** (A) The prevalence of drowning death rate among children aged 1-4 years (2003 and 2011) and below 4 years (2021) in Bangladesh.<sup>2,5</sup> (B) The distribution of child drowning death prevalence among the divisions of Bangladesh.<sup>5</sup> (C) The distribution of child drowning death prevalence of Bangladeshi children according to age range.<sup>5</sup>

Confidential: For Review Only

1  
2  
3  
4  
5  
6  
7  
8  
9  
10  
11  
12  
13  
14  
15  
16  
17  
18  
19  
20  
21  
22  
23  
24  
25  
26  
27  
28  
29  
30  
31  
32  
33  
34  
35  
36  
37  
38  
39  
40  
41  
42  
43  
44  
45  
46  
47  
48  
49  
50  
51  
52  
53  
54  
55  
56  
57  
58  
59  
60

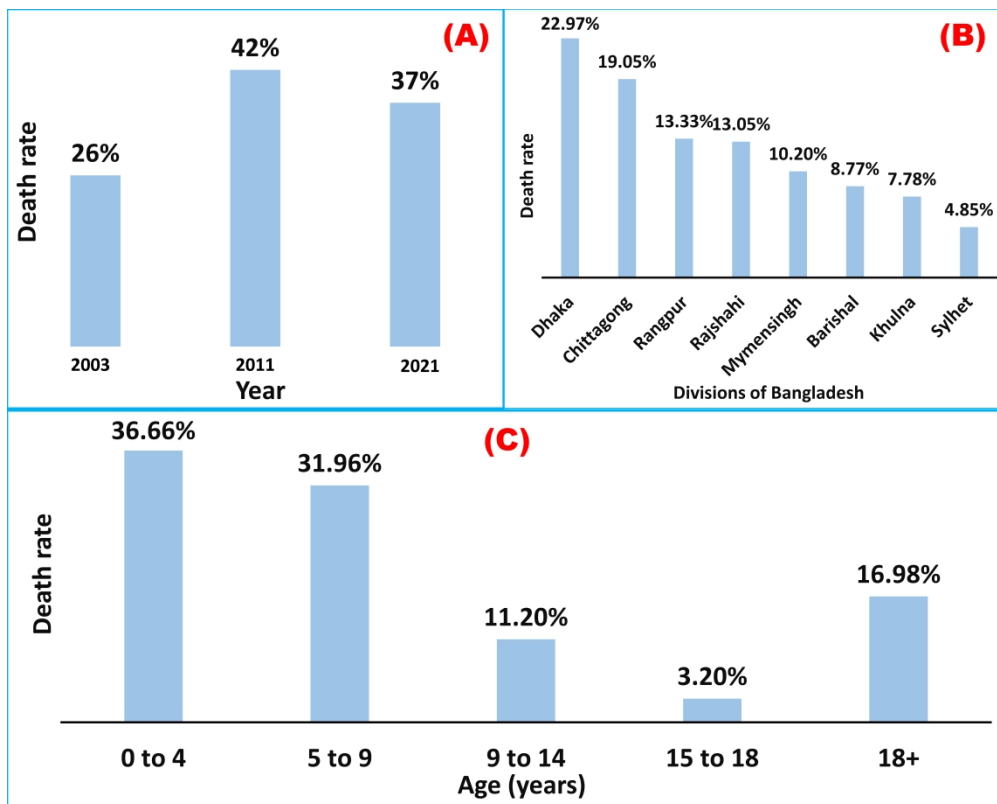

645x516mm (236 x 236 DPI)

# BMJ Paediatrics Open

## Child drownings in Bangladesh: Need for action

|                               |                                                                                                                                                                                                                                                                                                                                                                         |
|-------------------------------|-------------------------------------------------------------------------------------------------------------------------------------------------------------------------------------------------------------------------------------------------------------------------------------------------------------------------------------------------------------------------|
| Journal:                      | <i>BMJ Paediatrics Open</i>                                                                                                                                                                                                                                                                                                                                             |
| Manuscript ID                 | bmjpo-2022-001464.R1                                                                                                                                                                                                                                                                                                                                                    |
| Article Type:                 | Original research letter                                                                                                                                                                                                                                                                                                                                                |
| Date Submitted by the Author: | 08-Apr-2022                                                                                                                                                                                                                                                                                                                                                             |
| Complete List of Authors:     | Hossain, Md. Jamal; State University of Bangladesh, Al-Mamun, Md. ; Bangabandhu Sheikh Mujibur Rahman Science and Technology University<br>Alam, Morshed; Jagannath University, Institution of Education and Research<br>Khatun, Mst. Rukaia ; Varendra University<br>Sarker , Md. Mokleshur ; State University of Bangladesh<br>Islam, Md.; University of Asia Pacific |
| Keywords:                     | Child Abuse, Child Psychiatry, Epidemiology                                                                                                                                                                                                                                                                                                                             |
|                               |                                                                                                                                                                                                                                                                                                                                                                         |

SCHOLARONE™  
Manuscripts



I, the Submitting Author has the right to grant and does grant on behalf of all authors of the Work (as defined in the below author licence), an exclusive licence and/or a non-exclusive licence for contributions from authors who are: i) UK Crown employees; ii) where BMJ has agreed a CC-BY licence shall apply, and/or iii) in accordance with the terms applicable for US Federal Government officers or employees acting as part of their official duties; on a worldwide, perpetual, irrevocable, royalty-free basis to BMJ Publishing Group Ltd ("BMJ") its licensees and where the relevant Journal is co-owned by BMJ to the co-owners of the Journal, to publish the Work in this journal and any other BMJ products and to exploit all rights, as set out in our [licence](#).

The Submitting Author accepts and understands that any supply made under these terms is made by BMJ to the Submitting Author unless you are acting as an employee on behalf of your employer or a postgraduate student of an affiliated institution which is paying any applicable article publishing charge ("APC") for Open Access articles. Where the Submitting Author wishes to make the Work available on an Open Access basis (and intends to pay the relevant APC), the terms of reuse of such Open Access shall be governed by a Creative Commons licence – details of these licences and which [Creative Commons](#) licence will apply to this Work are set out in our licence referred to above.

Other than as permitted in any relevant BMJ Author's Self Archiving Policies, I confirm this Work has not been accepted for publication elsewhere, is not being considered for publication elsewhere and does not duplicate material already published. I confirm all authors consent to publication of this Work and authorise the granting of this licence.

1  
2  
3 1 *Article type: Original Research Letter*  
4

5  
6 2 **Child drownings in Bangladesh: Need for action**  
7

8 3 **Md. Jamal Hossain<sup>1</sup>, Md. Al-Mamun<sup>2</sup>, Morshed Alam<sup>3</sup>, Mst. Rukaia Khatun<sup>4,5</sup>, Md. Moklesur**  
9  
10 4 **Rahman Sarker<sup>1</sup>, Md. Rabiul Islam<sup>6</sup>**

11  
12 5 <sup>1</sup> Department of Pharmacy, State University of Bangladesh, 77 Satmasjid Raod, Dhanmondi, Dhaka 1205,  
13 6 Bangladesh

14  
15 7 <sup>2</sup> Department of Sociology, Bangabandhu Sheikh Mujibur Rahman Science and Technology University,  
16 8 Gopalganj-8100, Bangladesh

17  
18 9 <sup>3</sup> Institute of Education and Research, Jagannath University, Dhaka-1100, Bangladesh

19  
20 10 <sup>4</sup> Department of Public Health, Varendra University, Rajshahi 6204, Bangladesh

21  
22 11 <sup>5</sup> Seba Nursing Institute, Chapainawabganj 6300, Bangladesh

23  
24 12 <sup>6</sup> Department of Pharmacy, University of Asia Pacific, 74/A Green Road, Farmgate, Dhaka 1215,  
25 13 Bangladesh

26  
27 14

28 15 **\* Correspondence**

29  
30 16 **Md. Jamal Hossain**

31  
32 17 Department of Pharmacy, State University of Bangladesh, 77 Satmasjid Road, Dhanmondi, Dhaka-1205,  
33 18 Bangladesh

34  
35 19 **Email:** jamal.du.p48@gmail.com

36 20 jamalhossain@sub.edu.bd  
37  
38 21

39  
40 22 **Keywords:** *Child drowning; Insufficient parental supervision; Seasonality; Disasters;*  
41 23 *Bangladesh.*

42  
43 24 **Word Count:** 690 (excluding title page, abstract, references, figures and tables)

44  
45 25 **References count:** 6

46  
47 26 **Figure count:** 1  
48  
49  
50  
51 27  
52  
53  
54 28  
55  
56  
57  
58  
59  
60

## 29 **Child drownings in Bangladesh: Need for action**

### 31 **Abstract**

32 Drowning is one of the major public health concerns, and children are the most vulnerable victims  
33 of drowning death in Bangladesh, which has been a paramount threat to child survival. Based on  
34 available data, we intend to underline the prevalence and associated risk factors for child drowning  
35 deaths in Bangladesh. According to the Center for Injury Prevention and Research, Bangladesh  
36 (CIPRB), about 19,000 people of all ages drown per year across the country, where approximately  
37 77% are children (<18 years), which means that over forty Bangladeshi children drown per day.  
38 A recent survey reported that as of data collected from January 2020 to June 2021, 83% of  
39 drowning victims were children. Insufficient parental supervision, mother's illiteracy, lack of  
40 swimming ability, male gender, children under five years, geographical and environmental  
41 conditions, seasonality, and disasters significantly contribute to child drowning deaths in  
42 Bangladesh. We urge the governments and local administrations to address the current crisis by  
43 coordinating and integrating several effective efforts to prevent child drowning deaths.

44 **Keywords:** *Child drowning; Insufficient parental supervision; Seasonality; Disasters;*  
45 *Bangladesh.*

### 47 **Main Text**

48 Drowning is a significant yet frequently overlooked public health hazard in both low and middle-  
49 income and high-income countries. According to the World Health Organization (WHO) Global  
50 Report-2019, 236000 people worldwide die every year from drowning, the world's third-leading  
51 cause of injury-related death.<sup>1</sup> Drowning is the eighth most significant cause of mortality and the  
52 twelfth leading source of illness burden in South-East Asia, including Bangladesh.<sup>2</sup> Over half of  
53 all drowning deaths occur in the Western Pacific and Southeast Asian region. As of data published  
54 by Unicef and the National Institute of Population Research and Training (NIPRT), drowning-  
55 death accounted for over one-fourth (26%) and two-fifths (42%) deaths of all deaths of children  
56 aged 1 to 4 years in Bangladesh in 2003 and 2011, respectively (Figure 1, Panel A).<sup>2</sup> Notably,

1  
2  
3 57 children aged 0 to 4 years are near three times more likely to drown than children aged 10-17  
4 58 years.<sup>3</sup> Besides, the prevalence of death rate from the drowning of rural children is significantly  
5 59 higher than urban children in the country.<sup>2,3</sup>  
6  
7

8  
9 60 A survey conducted by the Center for Injury Prevention and Research, Bangladesh (CIPRB) in  
10 61 collaboration with the Department of Health and Unicef reported that approximately 19,000 people  
11 62 of all ages drown per year in Bangladesh. Among them, 14,500 (77%) are children.<sup>4</sup> Another recent  
12 63 survey performed by SoMaSHTe (Society for Media and Suitable Human Communication  
13 64 Techniques) in support of Global Health Advocacy Incubator (GHAI) documented 1402 deaths  
14 65 from 875 drowning incidents, where 83% (n = 1164) of victims were children in the last one and  
15 66 half years (January 2020 to June 2021). More than two-thirds (□ 69%, n = 962) were below nine  
16 67 years (0 to 4 years = 514 and 5 to 9 years = 448; Figure 1, Panel B).<sup>5</sup> The study also reported that  
17 68 boys were significantly more at risk of being victims of drowning when compared to girls (60.82%  
18 69 vs. 38.65%), and the Dhaka (n = 322) and Chittagong (n = 267) divisions showed the highest  
19 70 prevalence in terms of death rates in the country (Figure 1, Panel C).<sup>5</sup>  
20  
21  
22  
23  
24  
25  
26  
27

28 71 Children in low- and middle-income countries, including Bangladesh, are more likely to drown if  
29 72 they are not adequately supervised, male, there are no physical barriers between them and bodies  
30 73 of water, and they are not proficient swimmers.<sup>1,2,3</sup> In countries and regions where social,  
31 74 economic, and geographic shifts occur, the risks of drowning deaths vary widely. Besides, parents'  
32 75 illiteracy (no schooling) was associated with 3.7 times and 2.9 times higher risk of fatal and non-  
33 76 fatal drowning, respectively, than secondary or higher-level education in Bangladesh.<sup>2</sup> Around  
34 77 80% of the drowning deaths occur due to exposure to natural water bodies like ponds, channels,  
35 78 buckets, and ditches within 20 meters of victim's home.<sup>2,4</sup> Furthermore, three-fifths (60%)  
36 79 drowning cases occur between 9 am and 1 pm, and children of large households (five or more  
37 80 children) are more at risk than children of small families (less than three children).<sup>3</sup> Particularly,  
38 81 children in Bangladesh's lower regions (particularly in the southern part) are at greater risk than  
39 82 those in the country's higher areas because of their geographic location. Moreover, lack of  
40 83 parenteral supervision and oversight, disasters, lack of awareness of water safety, and unsafe  
41 84 behavior around water may be considered dominant factors behind child mortality due to  
42 85 drowning.<sup>2,3</sup>  
43  
44  
45  
46  
47  
48  
49  
50  
51  
52  
53  
54  
55  
56  
57  
58  
59  
60

1  
2  
3 86 The government of Bangladesh has already traced the issue of drowning as a prime concern of  
4  
5 87 children's death and initiated some pilot actions for child protection. However, the regular  
6  
7 88 epidemiological surveillance and the rigorous drive to boost awareness countrywide are still  
8  
9 89 unfocused. The government and all the relevant social organizations should be committed to  
10  
11 90 implementing a long-term national strategy based on proven interventions like establishing  
12  
13 91 community-based childcare institutions with daycare to curb the high incidence of drowning. It is  
14  
15 92 evident from a pilot-based study that community-based supervision of young children and teaching  
16  
17 93 of swimming to older children reduced by 82% and 90% chances of drowning, respectively.<sup>6</sup>  
18  
19 94 Besides, parents and guardians need to make sure the kids understand the numerous places where  
20  
21 95 they could drown. Furthermore, attention and raising community awareness of proper drowning  
22  
23 96 rescue and resuscitation techniques should be a vital component of any program to reduce the  
24  
25 97 death toll in Bangladesh.  
26

98

## 99 **Statements**

### 100 **Patient and public involvement**

101 Patients and/or the public were not involved in the design, or conduct, or reporting, or  
102 dissemination plans of this research.

### 103 **Funding**

104 This research received no specific grant from any funding agency in the public, commercial or  
105 not-for-profit sectors.

### 106 **Competing Interests**

107 None declared.

### 108 **Contributors**

109 MAM conceived the idea and MJH designed the study. MJH, MAM, MA, and MRK collected  
110 data. MJH, MAM, MA, and MRK drafted the original version of the manuscript. MJH, MMRS,  
111 and MRI critically revised and improved the manuscript. All authors reviewed and approved the  
112 final version of the manuscript for publication.



113 **References**

- 114 1. World Health Organization. Drowning. Available from: [https://www.who.int/news-room/fact-](https://www.who.int/news-room/fact-sheets/detail/drowning)  
115 [sheets/detail/drowning](https://www.who.int/news-room/fact-sheets/detail/drowning) (accessed April 7, 2022)
- 116 2. Rahman A, Alonge O, Bhuiyan AA, Agrawal P, Salam SS, Talab A, Rahman QS, Hyder AA.  
117 Epidemiology of Drowning in Bangladesh: An Update. *Int J Environ Res Public Health*. 2017;  
118 14(5): 488. doi: 10.3390/ijerph14050488.
- 119 3. Hossain M, Mani KK, Sidik SM, Hayati KS, Rahman AK. Socio-demographic, environmental  
120 and caring risk factors for childhood drowning deaths in Bangladesh. *BMC Pediatr*. 2015; 15:  
121 114. doi: 10.1186/s12887-015-0431-7.
- 122 4. Dhaka Tribune. Children under 10 account for 70% of drowning deaths in Bangladesh.  
123 Available from [https://www.dhakatribune.com/bangladesh/2021/07/25/children-under-10-](https://www.dhakatribune.com/bangladesh/2021/07/25/children-under-10-account-for-70-of-drowning-deaths-in-bangladesh)  
124 [account-for-70-of-drowning-deaths-in-bangladesh](https://www.dhakatribune.com/bangladesh/2021/07/25/children-under-10-account-for-70-of-drowning-deaths-in-bangladesh) [Accessed February 24, 2022].
- 125 5. Dhaka Tribune. Report: 83% drowning victims are children. Available from:  
126 [https://archive.dhakatribune.com/bangladesh/nation/2021/07/08/report-83-drowning-victims-](https://archive.dhakatribune.com/bangladesh/nation/2021/07/08/report-83-drowning-victims-are-children)  
127 [are-children](https://archive.dhakatribune.com/bangladesh/nation/2021/07/08/report-83-drowning-victims-are-children) [Accessed February 24, 2022].
- 128 6. CIPRB. Available from: [https://www.ciprb.org/centres/international-drowning-research-](https://www.ciprb.org/centres/international-drowning-research-centre-bangladesh-idrc-b/notable-activities/anchal/)  
129 [centre-bangladesh-idrc-b/notable-activities/anchal/](https://www.ciprb.org/centres/international-drowning-research-centre-bangladesh-idrc-b/notable-activities/anchal/) [Accessed February 26, 2022]

1  
2  
3 144  
4  
5  
6 145  
7  
8 146  
9  
10 147  
11 148  
12  
13 149  
14  
15 150  
16 151  
17  
18 152  
19  
20  
21 153  
22  
23  
24  
25  
26  
27  
28  
29  
30  
31  
32  
33  
34  
35  
36  
37  
38  
39  
40  
41  
42  
43  
44  
45  
46  
47  
48  
49  
50  
51  
52  
53  
54  
55  
56  
57  
58  
59  
60

**Figure 1.** (A) The drowning death rate among children aged 1-4 years (2003 and 2011) and below four years (2021) in Bangladesh.<sup>2,5</sup> (B) The distribution of drowning deaths occurred among Bangladeshi children according to age range in January 2020 to June 2021.<sup>5</sup> (C) The distribution of child drowning deaths among the divisions of Bangladesh in January 2020 to June 2021.<sup>5</sup>

Confidential: For Review Only

1  
2  
3  
4  
5  
6  
7  
8  
9  
10  
11  
12  
13  
14  
15  
16  
17  
18  
19  
20  
21  
22  
23  
24  
25  
26  
27  
28  
29  
30  
31  
32  
33  
34  
35  
36  
37  
38  
39  
40  
41  
42  
43  
44  
45  
46  
47  
48  
49  
50  
51  
52  
53  
54  
55  
56  
57  
58  
59  
60

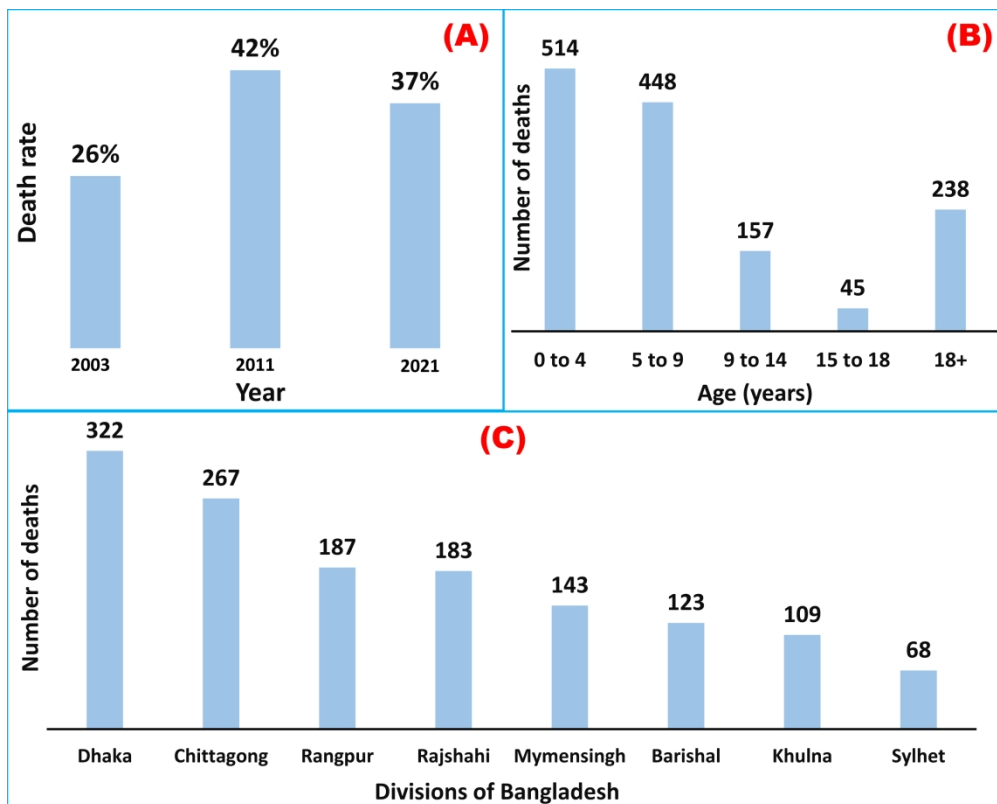

254x203mm (300 x 300 DPI)

# BMJ Paediatrics Open

## Child drownings in Bangladesh: Need for action

|                               |                                                                                                                                                                                                                                                                                                                                                                         |
|-------------------------------|-------------------------------------------------------------------------------------------------------------------------------------------------------------------------------------------------------------------------------------------------------------------------------------------------------------------------------------------------------------------------|
| Journal:                      | <i>BMJ Paediatrics Open</i>                                                                                                                                                                                                                                                                                                                                             |
| Manuscript ID                 | bmjpo-2022-001464.R2                                                                                                                                                                                                                                                                                                                                                    |
| Article Type:                 | Original research letter                                                                                                                                                                                                                                                                                                                                                |
| Date Submitted by the Author: | 29-Apr-2022                                                                                                                                                                                                                                                                                                                                                             |
| Complete List of Authors:     | Hossain, Md. Jamal; State University of Bangladesh, Al-Mamun, Md. ; Bangabandhu Sheikh Mujibur Rahman Science and Technology University<br>Alam, Morshed; Jagannath University, Institution of Education and Research<br>Khatun, Mst. Rukaia ; Varendra University<br>Sarker , Md. Mokleshur ; State University of Bangladesh<br>Islam, Md.; University of Asia Pacific |
| Keywords:                     | Child Abuse, Child Psychiatry, Epidemiology                                                                                                                                                                                                                                                                                                                             |
|                               |                                                                                                                                                                                                                                                                                                                                                                         |

SCHOLARONE™  
Manuscripts



I, the Submitting Author has the right to grant and does grant on behalf of all authors of the Work (as defined in the below author licence), an exclusive licence and/or a non-exclusive licence for contributions from authors who are: i) UK Crown employees; ii) where BMJ has agreed a CC-BY licence shall apply, and/or iii) in accordance with the terms applicable for US Federal Government officers or employees acting as part of their official duties; on a worldwide, perpetual, irrevocable, royalty-free basis to BMJ Publishing Group Ltd ("BMJ") its licensees and where the relevant Journal is co-owned by BMJ to the co-owners of the Journal, to publish the Work in this journal and any other BMJ products and to exploit all rights, as set out in our [licence](#).

The Submitting Author accepts and understands that any supply made under these terms is made by BMJ to the Submitting Author unless you are acting as an employee on behalf of your employer or a postgraduate student of an affiliated institution which is paying any applicable article publishing charge ("APC") for Open Access articles. Where the Submitting Author wishes to make the Work available on an Open Access basis (and intends to pay the relevant APC), the terms of reuse of such Open Access shall be governed by a Creative Commons licence – details of these licences and which [Creative Commons](#) licence will apply to this Work are set out in our licence referred to above.

Other than as permitted in any relevant BMJ Author's Self Archiving Policies, I confirm this Work has not been accepted for publication elsewhere, is not being considered for publication elsewhere and does not duplicate material already published. I confirm all authors consent to publication of this Work and authorise the granting of this licence.

1  
2  
3 1 *Article type: Original Research Letter*  
4

5  
6 2 **Child drownings in Bangladesh: Need for action**  
7

8 3 **Md. Jamal Hossain<sup>1</sup>, Md. Al-Mamun<sup>2</sup>, Morshed Alam<sup>3</sup>, Mst. Rukaia Khatun<sup>4,5</sup>, Md. Moklesur**  
9  
10 4 **Rahman Sarker<sup>1</sup>, Md. Rabiul Islam<sup>6</sup>**

11  
12 5 <sup>1</sup> Department of Pharmacy, State University of Bangladesh, 77 Satmasjid Raod, Dhanmondi, Dhaka 1205,  
13 6 Bangladesh

14  
15 7 <sup>2</sup> Department of Sociology, Bangabandhu Sheikh Mujibur Rahman Science and Technology University,  
16 8 Gopalganj-8100, Bangladesh

17  
18 9 <sup>3</sup> Institute of Education and Research, Jagannath University, Dhaka-1100, Bangladesh

19  
20 10 <sup>4</sup> Department of Public Health, Varendra University, Rajshahi 6204, Bangladesh

21  
22 11 <sup>5</sup> Seba Nursing Institute, Chapainawabganj 6300, Bangladesh

23  
24 12 <sup>6</sup> Department of Pharmacy, University of Asia Pacific, 74/A Green Road, Farmgate, Dhaka 1215,  
25 13 Bangladesh

26  
27 14

28 15 **\* Correspondence**

29  
30 16 **Md. Jamal Hossain**

31  
32 17 Department of Pharmacy, State University of Bangladesh, 77 Satmasjid Road, Dhanmondi, Dhaka-1205,  
33 18 Bangladesh

34  
35 19 **Email:** jamal.du.p48@gmail.com

36 20 jamalhossain@sub.edu.bd  
37  
38 21

39  
40 22 **Keywords:** *Child drowning; Insufficient parental supervision; Seasonality; Disasters;*  
41 23 *Bangladesh.*

42  
43 24 **Word Count:** 690 (excluding title page, abstract, references, figures and tables)

44  
45 25 **References count:** 6

46  
47 26 **Figure count:** 1  
48  
49  
50  
51 27  
52  
53  
54 28  
55  
56  
57  
58  
59  
60

## 29 **Child drownings in Bangladesh: Need for action**

### 31 **Abstract**

32 Drowning is one of the major public health concerns, and children are the most vulnerable victims  
33 of drowning death in Bangladesh, which has been a paramount threat to child survival. Based on  
34 available data, we intend to underline the prevalence and associated risk factors for child drowning  
35 deaths in Bangladesh. According to the Center for Injury Prevention and Research, Bangladesh  
36 (CIPRB), about 19,000 people of all ages drown per year across the country, where approximately  
37 77% are children (<18 years), which means that over forty Bangladeshi children drown per day.  
38 A recent survey reported that as of data collected from January 2020 to June 2021, 83% of  
39 drowning victims were children. Insufficient parental supervision, mother's illiteracy, lack of  
40 swimming ability, male gender, children under five years, geographical and environmental  
41 conditions, seasonality, and disasters significantly contribute to child drowning deaths in  
42 Bangladesh. We urge the governments and local administrations to address the current crisis by  
43 coordinating and integrating several effective efforts to prevent child drowning deaths.

44 **Keywords:** *Child drowning; Insufficient parental supervision; Seasonality; Disasters;*  
45 *Bangladesh.*

### 47 **Main Text**

48 Drowning is a significant yet frequently overlooked public health hazard in both low and middle-  
49 income and high-income countries. According to the World Health Organization (WHO) Global  
50 Report-2019, 236000 people worldwide die every year from drowning, the world's third-leading  
51 cause of injury-related death.<sup>1</sup> Drowning is the eighth most significant cause of mortality and the  
52 twelfth leading source of illness burden in South-East Asia, including Bangladesh.<sup>2</sup> Over half of  
53 all drowning deaths occur in the Western Pacific and Southeast Asian region. As of data published  
54 by Unicef and the National Institute of Population Research and Training (NIPRT), drowning-  
55 death accounted for over one-fourth (26%) and two-fifths (42%) of all deaths in children aged 1  
56 to 4 years in Bangladesh in 2003 and 2011, respectively (Figure 1, Panel A).<sup>2</sup> Notably, children

1  
2  
3 57 aged 0 to 4 years are near three times more likely to drown than children aged 10-17 years.<sup>3</sup> The  
4 58 risk of drowning is significantly higher in rural children.<sup>2,3</sup>

59 A survey conducted by the Center for Injury Prevention and Research, Bangladesh (CIPRB) in  
60 collaboration with the Department of Health and Unicef reported that approximately 19,000 people  
61 of all ages drown per year in Bangladesh. Among them, 14,500 (77%) are children.<sup>4</sup> Another recent  
62 survey performed by SoMaSHTe (Society for Media and Suitable Human Communication  
63 Techniques) in support of Global Health Advocacy Incubator (GHAI) documented 1402 deaths  
64 from 875 drowning incidents, where 83% (n = 1164) of victims were children in the last one and  
65 half years (January 2020 to June 2021). More than two-thirds (□ 69%, n = 962) were below nine  
66 years (0 to 4 years = 514 and 5 to 9 years = 448; Figure 1, Panel B).<sup>5</sup> The study also reported that  
67 boys were significantly more at risk of being victims of drowning when compared to girls (60.82%  
68 vs. 38.65%), and the Dhaka (n = 322) and Chittagong (n = 267) divisions showed the highest  
69 number of deaths (Figure 1, Panel C).<sup>5</sup>

70 Children in low- and middle-income countries, including Bangladesh, are more likely to drown if  
71 they are not adequately supervised, male, there are no physical barriers between them and bodies  
72 of water, and they are not proficient swimmers.<sup>1,2,3</sup> In countries and regions where social,  
73 economic, and geographic shifts occur, the risks of drowning deaths vary widely. Besides, parents'  
74 illiteracy (no schooling) was associated with 3.7 times and 2.9 times higher risk of fatal and non-  
75 fatal drowning, respectively, than secondary or higher-level education in Bangladesh.<sup>2</sup> Around  
76 80% of the drowning deaths occur due to exposure to ponds, channels, buckets, and ditches within  
77 20 meters of victim's home.<sup>2,4</sup> Furthermore, three-fifths (60%) drowning cases occur between 9  
78 am and 1 pm, and children of large households (five or more children) are more at risk than children  
79 of small families (less than three children).<sup>3</sup> Particularly, children in Bangladesh's lower regions  
80 (particularly in the southern part) are at greater risk than those in the country's higher areas because  
81 of their geographic location. Moreover, lack of parental supervision and oversight, disasters, lack  
82 of awareness of water safety, and unsafe behavior around water may be considered dominant  
83 factors behind child mortality due to drowning.<sup>2,3</sup>

84 The government of Bangladesh has already traced the issue of drowning as a prime concern of  
85 children's death and initiated some pilot actions for child protection. However, the regular  
86 epidemiological surveillance and the rigorous drive to boost awareness countrywide are still



87 unfocused. The government and all the relevant social organizations should be committed to  
88 implementing a long-term national strategy based on proven interventions like establishing  
89 community-based childcare institutions with daycare to curb the high incidence of drowning. It is  
90 evident from a pilot-based study that community-based supervision of young children and teaching  
91 of swimming to older children reduced by 82% and 90% chances of drowning, respectively.<sup>6</sup>  
92 Besides, parents and guardians need to make sure the children understand the numerous places  
93 where they could drown. Furthermore, attention and raising community awareness of proper  
94 drowning rescue and resuscitation techniques should be a vital component of any program to  
95 reduce the death toll in Bangladesh.

96

## 97 **Statements**

### 98 **Patient and public involvement**

99 Patients and/or the public were not involved in the design, or conduct, or reporting, or  
100 dissemination plans of this research.

### 101 **Funding**

102 This research received no specific grant from any funding agency in the public, commercial or  
103 not-for-profit sectors.

### 104 **Competing Interests**

105 None declared.

### 106 **Contributors**

107 MAM conceived the idea and MJH designed the study. MJH, MAM, MA, and MRK collected  
108 data. MJH, MAM, MA, and MRK drafted the original version of the manuscript. MJH, MMRS,  
109 and MRI critically revised and improved the manuscript. All authors reviewed and approved the  
110 final version of the manuscript for publication.

## 111 **References**

- 112 1. World Health Organization. Drowning. Available from: [https://www.who.int/news-room/fact-](https://www.who.int/news-room/fact-sheets/detail/drowning)  
113 [sheets/detail/drowning](https://www.who.int/news-room/fact-sheets/detail/drowning) (accessed April 7, 2022)

- 1  
2  
3 114 2. Rahman A, Alonge O, Bhuiyan AA, Agrawal P, Salam SS, Talab A, Rahman QS, Hyder AA.  
4  
5 115 Epidemiology of Drowning in Bangladesh: An Update. *Int J Environ Res Public Health*. 2017;  
6  
7 116 14(5): 488. doi: 10.3390/ijerph14050488.
- 8  
9 117 3. Hossain M, Mani KK, Sidik SM, Hayati KS, Rahman AK. Socio-demographic, environmental  
10  
11 118 and caring risk factors for childhood drowning deaths in Bangladesh. *BMC Pediatr*. 2015; 15:  
12 119 114. doi: 10.1186/s12887-015-0431-7.
- 13  
14 120 4. Dhaka Tribune. Children under 10 account for 70% of drowning deaths in Bangladesh.  
15  
16 121 Available from [https://www.dhakatribune.com/bangladesh/2021/07/25/children-under-10-](https://www.dhakatribune.com/bangladesh/2021/07/25/children-under-10-account-for-70-of-drowning-deaths-in-bangladesh)  
17 122 [account-for-70-of-drowning-deaths-in-bangladesh](https://www.dhakatribune.com/bangladesh/2021/07/25/children-under-10-account-for-70-of-drowning-deaths-in-bangladesh) [Accessed February 24, 2022].
- 18  
19 123 5. Dhaka Tribune. Report: 83% drowning victims are children. Available from:  
20  
21 124 [https://archive.dhakatribune.com/bangladesh/nation/2021/07/08/report-83-drowning-victims-](https://archive.dhakatribune.com/bangladesh/nation/2021/07/08/report-83-drowning-victims-are-children)  
22 125 [are-children](https://archive.dhakatribune.com/bangladesh/nation/2021/07/08/report-83-drowning-victims-are-children) [Accessed February 24, 2022].
- 23  
24 126 6. CIPRB. Available from: [https://www.ciprb.org/centres/international-drowning-research-](https://www.ciprb.org/centres/international-drowning-research-centre-bangladesh-idrc-b/notable-activities/anchal/)  
25 127 [centre-bangladesh-idrc-b/notable-activities/anchal/](https://www.ciprb.org/centres/international-drowning-research-centre-bangladesh-idrc-b/notable-activities/anchal/) [Accessed February 26, 2022]

1  
2  
3  
4  
5  
6  
7  
8  
9  
10  
11  
12  
13  
14  
15  
16  
17  
18  
19  
20  
21  
22  
23  
24  
25  
26  
27  
28  
29  
30  
31  
32  
33  
34  
35  
36  
37  
38  
39  
40  
41  
42  
43  
44  
45  
46  
47  
48  
49  
50  
51  
52  
53  
54  
55  
56  
57  
58  
59  
60

**Figure 1.** (A) Percentage of drowning deaths in children aged 1-4 years (2003 and 2011) and in children under 4 years of age (2021) in Bangladesh.<sup>2,5</sup> (B) The distribution of drowning deaths occurred among Bangladeshi children according to age range in January 2020 to June 2021.<sup>5</sup> (C) The distribution of child drowning deaths among the divisions of Bangladesh in January 2020 to June 2021.<sup>5</sup>

Confidential: For Review Only

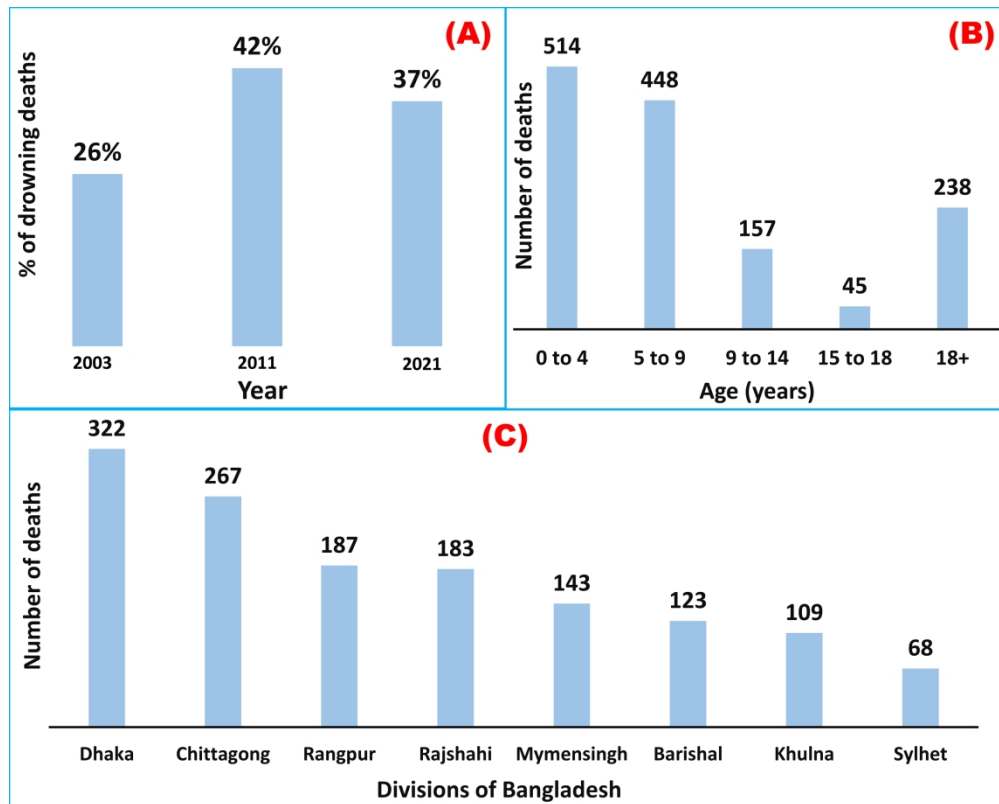

254x203mm (300 x 300 DPI)
